1 **High-throughput Identification of Eukaryotic Parasites and Arboviruses in Mosquitoes**

2 **Running title: High-throughput Surveillance of Parasites and Viruses**

3

4 Matthew V. Cannon<sup>1</sup>, Haikel N. Bogale<sup>1</sup>, Devika Bhalerao<sup>1</sup>, Kalil Keita<sup>2</sup>, Denka Camara<sup>2</sup>, Yaya Barry<sup>2</sup>,  
5 Moussa Keita<sup>2</sup>, Drissa Coulibaly<sup>3</sup>, Abdoulaye K. Kone<sup>3</sup>, Ogobara K. Doumbo<sup>3†</sup>, Mahamadou A. Thera<sup>3</sup>,  
6 Christopher V. Plowe<sup>4</sup>, Mark A. Travassos<sup>4</sup>, Seth R. Irish<sup>5</sup>, Joshua Yeroshefsky<sup>6</sup>, Jeannine Dorothy<sup>7</sup>, Brian  
7 Prendergast<sup>7</sup>, Brandyce St. Laurent<sup>8</sup>, Megan L. Fritz<sup>6</sup>, David Serre<sup>1\*</sup>

8

9 <sup>1</sup>Institute for Genome Sciences, University of Maryland School of Medicine, Baltimore, MD, USA.

10 <sup>2</sup>Programme National de Lutte contre le Paludisme, Guinea.

11 <sup>3</sup>Malaria Research and Training Center, University Science, Techniques and Technologies of Bamako,  
12 Mali.

13 <sup>4</sup>Malaria Research Program, Center for Vaccine Development and Global Health, University of Maryland  
14 School of Medicine, Baltimore, USA.

15 <sup>5</sup>U.S. President's Malaria Initiative and Entomology Branch, Division of Parasitic Diseases and Malaria,  
16 Center for Global Health, Centers for Disease Control and Prevention, Atlanta, USA.

17 <sup>6</sup>Department of Entomology, University of Maryland College Park, College Park, MD, USA.

18 <sup>7</sup>Mosquito Control Program, Maryland Department of Agriculture, Annapolis, MD, USA.

19 <sup>8</sup>Laboratory of Malaria and Vector Research, National Institute of Allergy and Infectious Diseases,  
20 Rockville, MD, USA.

21 †Deceased

22

23 \* correspondence to [dserre@som.umaryland.edu](mailto:dserre@som.umaryland.edu)

24 University of Maryland School of Medicine

25 Institute for Genome Sciences

26 Department of Microbiology & Immunology

27 HSFIII

28 670 West Baltimore Street, Room 3111

29 Baltimore, MD 21201

30 **Abbreviations:** National Center for Parasitology, Entomology, and Malaria Control (CNM), American  
31 Type Culture Collection (ATCC)

### 32 **Acknowledgements**

33 We wish to thank our collaborators at the National Center for Parasitology, Entomology, and Malaria  
34 Control (CNM) in Phnom Penh, Stop Palu and the National Malaria Control Program in Guinea and at the  
35 Malaria Research and Training Center, University of Science, Techniques and Technologies, Bamako,  
36 Mali for their help with the sample collection and processing, as well as Erin Haser, Rachel Koch, Jessica  
37 Moskowitz, Rachel Shuck, and Elizabeth Allan. We also thank Stop Palu (RTI), the U.S. President's  
38 Malaria Initiative, and all those participating in collections for support in the sample collection and  
39 processing in Guinea. The findings and conclusions in this report are those of the authors and do not  
40 necessarily represent the official position of the Centers for Disease Control and Prevention.

### 41 **Conflict of interest statement:**

42 The authors have stated explicitly that there are no conflicts of interest in connection with this article.

### 43 **Author contributions**

44 MVC, BSTL, MF and DS designed the study. BSTL, MF, KK, DC, YB, MK, DC, AKK, OKD, MAT, CVP, MT, SI,  
45 JD and BP collected and/or provided access to the mosquito samples. MVC, HB, BSTL and DB performed  
46 the laboratory experiments. MVC analyzed the data. MVC and DS prepared the manuscript. All authors  
47 read and approved the final manuscript.

48

49

50 **Abstract**

51 Vector-borne pathogens cause many human infectious diseases and are responsible for high mortality  
52 and morbidity throughout the world. They can also cause livestock epidemics with dramatic social and  
53 economic consequences. Due to the high costs, vector-borne disease surveillance is often limited to  
54 current threats, and the investigation of emerging pathogens typically occur after the reports of clinical  
55 cases. Here, we use high-throughput sequencing to detect and identify a wide range of parasites and  
56 viruses carried by mosquitoes from Cambodia, Guinea, Mali and Maryland. We apply this approach to  
57 individual *Anopheles* mosquitoes as well as pools of mosquitoes captured in traps; and compare the  
58 outcomes of this assay when applied to DNA or RNA. We identified known human and animal pathogens  
59 and mosquito parasites belonging to a wide range of taxa, insect Flaviviruses, and novel DNA sequences  
60 from previously uncharacterized organisms. Our results also revealed that analysis of the content of an  
61 entire trap is an efficient approach to monitor and identify potential vector-borne pathogens in large  
62 surveillance studies, and that analyses of RNA extracted from mosquitoes is preferable, when possible,  
63 over DNA-based analyses. Overall, we describe a flexible and easy-to-customize assay that can provide  
64 important information for vector-borne disease surveillance and research studies to efficiently  
65 complement current approaches.

66 **Keywords:** vector-borne pathogens, eukaryotic parasites, arbovirus, surveillance, zoonosis, emerging  
67 pathogens

68

## 69 **Introduction**

70 Different arthropods can, during a blood feeding, transmit viruses, protists and helminths to humans (1).  
71 These organisms cause some of the most prevalent human infectious diseases, including malaria,  
72 dengue, schistosomiasis or Chagas disease, and are responsible for more than 700,000 human deaths  
73 worldwide every year (2-4). Vector-borne diseases are also responsible for some of the most alarming  
74 recent epidemics in the western hemisphere, either due to the emergence of new pathogens (e.g., Zika  
75 (5, 6)), the reemergence of historically important pathogens (e.g., Yellow Fever (7)) or the expansion of  
76 diseases beyond their historical ranges (e.g., West Nile (8) and Chikungunya (7)). In addition to this  
77 burden on human health, many vector-borne diseases affect domesticated animals (e.g., heartworms (9,  
78 10)), livestock (e.g., Theileriosis (11, 12)) and wild animals (e.g., avian malaria (13, 14)). Some of these  
79 animal diseases have dramatic economic consequences in endemic areas (11, 12), while others are  
80 zoonotic diseases, further affecting human populations (15-20).

81 Efficient vector-borne disease surveillance is critical for reducing disease transmission and preventing  
82 outbreaks. Past elimination campaigns for vector-borne diseases, usually targeting a specific human  
83 pathogen, have often relied on entomological approaches such as widespread insecticide spraying and  
84 disruption of larval habitats (21, 22). To be successful, such efforts need to be guided by detailed  
85 knowledge of the parasites' and vectors' distributions. Unfortunately, current entomological  
86 surveillance approaches are extremely resource-intensive: the collection of samples is time consuming  
87 requiring trained personnel, vector species identification is laborious, and the detection of pathogens is  
88 expensive since hundreds of mosquitoes typically need to be screened to identify a few infected ones.  
89 Consequently, public health officials and vector biologists typically focus on monitoring only a few  
90 specific pathogens associated with the most current threats. These constraints are particularly  
91 problematic as they hamper the early detection of emerging pathogens and vector surveillance is often  
92 implemented in response to reports of clinical cases rather than preventively.

93 We have recently described a sequencing-based method using high-throughput amplicon sequencing to  
94 detect known and previously uncharacterized eukaryotic parasites from biological samples in a  
95 comprehensive, high-throughput and cost-efficient manner (23). Here, we present the application of this  
96 approach to characterize eukaryotic parasites and arboviruses from more than 900 individual *Anopheles*  
97 mosquitoes collected in Cambodia, Guinea and Mali, as well as from 25 pools of mosquitoes captured in  
98 CDC CO<sub>2</sub>-baited light traps in Maryland, USA. We also compare the performance of the assay when  
99 screening DNA and RNA from the same samples. Overall, our study demonstrates how this sequencing-  
100 based assay could significantly improve monitoring of human and animal vector-borne pathogens.

101

## 102 **Methods**

### 103 **Samples**

104 We analyzed a total of 930 individual mosquitoes, as well as 25 pools each containing 50-291  
105 mosquitoes (2,589 total) (**Table 1** and **Supplemental Tables 1-3**).

106 First, we analyzed DNA previously extracted from 265 individual *Anopheles* mosquitoes collected in the  
107 Cambodian provinces of Pursat, Preah Vihear, and Ratanakiri (24). These mosquitoes were collected  
108 using cow- or human-baited tents, human landing collections, CDC light traps and barrier-screen fences  
109 and immediately preserved by desiccation upon collection. These 265 *Anopheles* mosquitoes represent  
110 22 different species collected between July and August of 2013 (see **Supplemental Table 1** for details).

111 Second, we included DNA samples from 81 individual mosquitoes collected in Bandiagara, Mali. DNA  
112 from these samples was extracted using Chelex® 100 (Bio-Rad) after incubation of bisected and  
113 homogenized mosquitoes in 1% saponin in PBS.

114 Third, we extracted DNA from 584 individual *Anopheles* mosquitoes collected in six sites in Guinea and  
115 preserved in ethanol immediately upon collection. These mosquitoes were collected by human landing  
116 catch and pyrethrum spray (**Supplemental Table 2**). Each mosquito was homogenized in 200 µl

117 ATL/proteinase K solution using five RNase-free 1 mm zirconium oxide beads in a TissueLyser II for 12  
118 minutes at 20 m/s. We centrifuged the solution at 2500 rpm for three minutes and incubated them at  
119 55°C for one hour. We performed a second homogenization step for four minutes at 20 m/s followed by  
120 a final incubation at 55°C overnight. We then isolated DNA using the Qiagen DNeasy 96 Blood & Tissue  
121 Kit according to the manufacturer's instruction and eluted DNA from each sample in 200 µl.  
122 Finally, we analyzed 25 pools of mosquitoes collected throughout Prince George's county (Maryland,  
123 USA) by the Maryland Department of Agriculture using CO<sub>2</sub>-baited light traps (**Supplemental Table 3**).  
124 Each pool contains all mosquitoes from one light-trap (~50-291 mosquitoes) and was stored at room  
125 temperature for up to 24 hours before long-term storage at -20°C. We homogenized each pool of  
126 mosquitoes using a Qiagen TissueLyser II with Teenprep Matrix D 15 ml homogenization tubes (MP  
127 Biomedicals) and isolated successively RNA and DNA from each sample using the RNeasy PowerSoil  
128 Total RNA kit (Qiagen) with the RNeasy PowerSoil DNA Elution Kit and a final elution volume of 100 µl.

### 129 **Evaluation of Arbovirus primers**

130 We tested universal flavivirus primers retrieved from the literature (25) on West Nile (n=3), Zika (n=2)  
131 and Dengue (n=2) viral RNAs obtained from the American Type Culture Collection (ATCC). We  
132 synthesized cDNA from 2 µL of RNA using M-MLV reverse transcriptase (Promega) and random  
133 hexamers, and amplified the resulting cDNA with GoTaq<sup>®</sup> DNA polymerase (Promega) under the  
134 following conditions: initial two-minute denaturing step at 95°C followed by 40 cycles of 95°C for 30  
135 seconds, 50°C for 30 seconds and 72°C for 40 seconds. A final extension at 72°C for ten minutes was  
136 followed by incubation at 4°C. We ran the products on an agarose gel to determine whether each virus  
137 RNA was amplifiable.

### 138 **PCR amplification of pathogen nucleic acids before high-throughput sequencing**

139 First, we synthesized cDNA using M-MLV reverse transcriptase (Promega) and random hexamers from  
140 either 1) 2  $\mu$ l of the nucleic acids isolated from the Guinean mosquitoes (i.e., using RNA carried over  
141 during the DNA extraction), or 2) 3  $\mu$ L of RNA extracted from the pools of Maryland mosquitoes.  
142 Then, we amplified DNA and cDNA (when available) from each sample, as well as from 176 no-DNA  
143 controls, with a total of 11 primer pairs, each targeting a specific taxon known to contain human  
144 pathogens (**Table 2**). For each primer pair, we amplified DNA and cDNA using GoTaq<sup>®</sup> DNA polymerase  
145 (Promega) under the following conditions: initial denaturing step at 95°C followed by 40 cycles of 95°C  
146 for 30 seconds, 50°C for 30 seconds and 72°C for 30 seconds. A final extension at 72°C for ten minutes  
147 was followed by incubation at 4°C. All primers used in these taxon-specific PCRs included 5'-end tails to  
148 serve as priming sites for a second PCR. We then pooled all PCR products generated from one sample  
149 and performed a second PCR using primers targeting these tails to incorporate, at the end of each  
150 amplified molecule, i) a unique oligonucleotide “barcode” specific to each sample and ii) DNA sequences  
151 complementary to the Illumina sequencing primers (26, 27) (**Supplemental Figure 1**). Finally, we pooled  
152 together the resulting barcoded libraries and sequenced them on an Illumina sequencer to generate an  
153 average of 12,703 paired-end reads of 251 or 301 bp per sample.

#### 154 **Bioinformatic analyses**

155 We first separated the reads generated from each sample according to their unique barcodes and  
156 merged the overlapping ends of each read pair using PANDAseq (28) to generate consensus DNA  
157 sequences and correct sequencing errors (that disproportionately occur at the end of the reads). Note  
158 that all primers were designed to amplify DNA sequences shorter than ~450 bp, allowing overlap of at  
159 least 50 bp between paired-end reads. All read pairs that did not merge correctly were discarded from  
160 further analyses. We identified and trimmed the primer sequences from each read and eliminated all  
161 consensus sequences shorter than 100 bp as they likely represent experimental artefacts (e.g., PCR  
162 chimeras and primer dimers). Using reads from all samples together, we recorded how many unique

163 DNA sequences were obtained and how many reads carried each of these unique DNA sequences.  
164 Sequences observed less than ten times in the entire dataset were omitted as they likely resulted from  
165 PCR or sequencing errors (26). We then compared each unique DNA sequence to all sequences  
166 deposited in the NCBI nt database using BLAST (29) and used custom pipelines  
167 (<https://github.com/MVesuviusC/2020MosquitoSurveillancePaper>) to retrieve the taxonomic  
168 information associated with the most similar sequence(s). For each sample, only sequences with at least  
169 10 reads and more than 70% identity with an annotated NCBI sequence over the entire sequence length  
170 were further considered. This identity cutoff, while low, allows inclusion of results from highly  
171 genetically divergent organisms which can then be scrutinized further. This is critical when identifying  
172 species without closely related sequences available. If DNA sequences from multiple species were  
173 equally similar to one of our sequences, we recorded all corresponding species names. Finally, we  
174 summarized, for each mosquito, the parasite species or virus identified, the percentage identity  
175 between the reads and the most similar NCBI sequence(s), and the number of reads supporting the  
176 identification in this sample.

### 177 **Phylogenetic analyses**

178 To better characterize specific DNA sequences with ambiguous species identification, we analyzed these  
179 sequences together with orthologous sequences from closely related species. Briefly, we used  
180 PrimerTree (26) to retrieve NCBI orthologous DNA sequences from all species of the targeted taxon. We  
181 aligned these sequences with the DNA sequence(s) amplified from the mosquito(es) using MAFFT (30)  
182 and reconstructed neighbor-joining trees using MEGA (31) to estimate the phylogenetic position of the  
183 amplified DNA sequences.

### 184 **Further determination of taxonomical assignments**



185 To improve species identification when multiple species had identical DNA sequences, or improve  
186 phylogenetic analyses of unknown sequences, we amplified and sequenced specifically chosen DNA loci  
187 from pathogens within the same mosquitoes.

188 For differentiating *Theileria* species, we used previously published primers (GGCGGCGTTTATTAGACC,  
189 TCAATTCCTTAAGTTTCAGCC) to amplify an informative portion of the 18S rRNA gene [31] using DNA  
190 from 19 samples identified as *Theileria* positive by high-throughput sequencing. Amplification was  
191 conducted under the following conditions: initial denaturing step at 95°C for two minutes followed by 40  
192 cycles of 95°C for 30 seconds, 50°C for 30 seconds and 72°C for 40 seconds. A final extension at 72°C for  
193 five minutes was followed by incubation at 4°C. Since gel electrophoresis revealed off-target  
194 amplification (multiple bands), we used a Pasteur pipette to collect a core from the agarose gel,  
195 corresponding to the expected 900 bp PCR product, and dissolved it in 100 µl of water at 60°C for 20  
196 minutes. We then re-amplified 10 µl of this DNA using 35 PCR cycles with the same conditions. After gel  
197 electrophoresis, we treated the PCR reaction with 0.046 µl of Exonuclease I (NEB) and 0.4625 µl of  
198 Shrimp alkaline phosphatase (Affymetrix) at 37°C for 30 minutes, with a final five-minute inactivation  
199 step at 95°C. We then Sanger sequenced each PCR product in both directions using the forward and  
200 reverse primers. We manually trimmed the reads and merged them using Flash (32). We aligned the  
201 reads, along with known *Theileria* sequences from the NCBI nucleotide database, using MAFFT (30, 33)  
202 and generated a neighbor joining tree with 500 bootstraps and plotted it in MEGA7 (34).

203 To identify the species of the filarial worms detected in two individual mosquitoes, we designed primers  
204 to amplify a 3.5 kb portion of the mitochondrial DNA. Briefly, we downloaded all available filarial worm  
205 (Filarioidea) mitochondrial sequences from the NCBI nucleotide database, aligned them, generated a  
206 consensus sequence and designed primers using primer3 (35). We then used these primers  
207 (TTCGTCGTGAGACAGAGCGG, AGGCCATTGACGGATGGTTTGTAC) to amplify DNA from the two positive  
208 mosquitoes using the Expand™ Long Range dNTPack kit (Sigma) using the following conditions: initial

209 denaturing step at 95°C for two minutes followed by 45 cycles of 92°C for 30 seconds, 55°C for 30  
210 seconds and 68°C for five minutes. A final extension at 68°C for ten minutes was followed by incubation  
211 at 4°C. We then performed a second PCR to add 10 bp barcodes to the 5' end of both forward and  
212 reverse primers to allow differentiating both samples after sequencing. The two barcodes differed by 8  
213 and 7 bases for the forward and reverse primers, respectively, with no more than 2 identical bases in a  
214 row (**Supplemental Table 4**). For this second PCR, we used the following conditions: initial denaturing  
215 step at 95°C for two minutes followed by 10 cycles of 92°C for 30 seconds, 55°C for 30 seconds and 68°C  
216 for five minutes. A final extension at 68°C for ten minutes was followed by incubation at 4°C. We  
217 purified the amplicons using AMPure XP beads (Beckman Coulter) (2:1 DNA:beads ratio) and then  
218 combined equimolar amounts of each barcoded PCR product before circular consensus sequencing on a  
219 PacBio Sequel. We then generated a consensus sequence for each sample and aligned these sequences  
220 to known nematode mitochondrial sequences using Mafft (30) and generated a neighbor joining tree in  
221 MEGA (36).

#### 222 **Assessment of the dynamics of viral and mosquito RNA degradation**

223 To assess the dynamics of viral RNA degradation over time, we analyzed colony *Culex pipiens*  
224 mosquitoes known to carry *Culex flavivirus*. The colony was initiated from diapausing adult *Culex pipiens*  
225 that were collected from Oak Lawn and Des Plaines, IL, on 2/8/10. These two collections were combined  
226 to make one colony, which was determined to be *Culex flavivirus* positive according reverse  
227 transcriptase PCR (25). We examined three pools of five mosquitoes for each condition (i.e., stored with  
228 no preservative, in ethanol or in RNAlater (Invitrogen)) and at each time point (i.e., fresh, after two-  
229 week or after four-week storage at room temperature). After 0, 2 or 4 weeks at room temperature, the  
230 mosquitoes were stored at -80°C until RNA isolation. We isolated RNA from each pool of mosquitoes  
231 using Qiazol (Qiagen) and eluted into 50 µl. We synthesized cDNA from 7 µl of RNA using m-MLV

232 (Promega) with random hexamers for PCRs using *Culex* primers and, separately, on 2 µl of RNA for PCRs  
233 using flavivirus primers.

234 For each pool of 5 *Culex* mosquitoes from the *Culex flavivirus*-infected colony, we performed  
235 quantitative reverse transcriptase PCR (qRT-PCR) to quantify the amount of mosquito and viral RNAs  
236 using the primers *Culex\_flavivirus\_3F* (TGCGAARGATCTDGAAGGAG) - *Culex\_flavivirus\_3R*  
237 (CACGCACAACAAGACGATRA) targeting the virus sequence, and *Culicinae\_Cox1\_379\_F*  
238 (AYCCHCCTCTTTCATCTGGA) - *Culicidae\_Cox1\_670\_R* (CCTCCTCCAATTGGRTCAAAG) targeting mosquito  
239 RNA. We used Perfecta SYBR green PCR mastermix (Quantabio) with the following conditions: initial 15-  
240 minute denaturing step at 95°C followed by 40 cycles of 95°C for 30 seconds, 55°C (*Culex* primers) or  
241 50°C (flavivirus primers) for 30 seconds and 72°C for one minute (*Culex* primers) or 40 seconds (flavivirus  
242 primers). We performed standard cycle threshold and melt curve analysis afterwards using default  
243 settings.

244

## 245 **Results**

### 246 **Amplicon sequencing for high-throughput characterization of microorganisms in mosquitoes**

247 We analyzed 265 *Anopheles* mosquitoes collected in Cambodia, 665 *Anopheles* mosquitoes collected in  
248 Guinea and Mali as well as the content of 25 light traps, each containing 50-291 mosquitoes, collected in  
249 Maryland, USA. We screened each sample for a wide range of eukaryotic parasites using 10 primer sets  
250 designed to amplify DNA from all species of the taxa known to include human pathogens:  
251 Apicomplexans, Kinetoplastids, Parabasalids, nematodes, Platyhelminthes and Microsporidians (**Table**  
252 **2**). We also screened RNA extracted from the individual African *Anopheles* and from the pools of  
253 mosquitoes from Maryland for flaviviruses (see Materials and Methods, **Table 2**). After taxon-specific  
254 amplification, we pooled all PCR products generated from the same mosquito together, barcoded them  
255 and sequenced all libraries to generate an average of 12,703 paired-end reads per sample

256 **(Supplemental Figure 1)**. After merging read pairs, stringent quality filters and removal of the products  
257 of off-target amplification (e.g., *Anopheles* and bacteria DNA sequences), we obtained 61,177 unique  
258 DNA sequences, each represented by ten reads or more, and accounting in total for 6,796,105 reads  
259 **(Supplemental Table 5)**. These sequences were amplified with all primers and from a total of 185  
260 samples: 42 out of 265 Cambodian mosquitoes (16%), 120 out of 665 African mosquitoes (18%), and 23  
261 out of the 25 pools (92%) of mosquitoes collected in Maryland were positive for at least one of the taxa  
262 tested. On average, each sequence was supported by 1,306 reads per sample (range: 10-43,440). By  
263 contrast, out of 176 negative controls, only 12 (7%) yielded any sequence from the targeted taxa and  
264 those were represented by 213 reads on average (range: 10-3,539).

#### 265 **Identification of eukaryotic parasites**

266 We retrieved DNA sequences identical to sequences previously amplified from *Theileria* parasites from  
267 22 African and 15 Cambodian mosquitoes, as well as from seven of the Maryland traps. *Theileria*  
268 sequences were successfully amplified with both the Apicomplexa and Eimeronia primer pairs. All  
269 samples positive for *Theileria* with the Eimeronia primers were also positive with the Apicomplexa  
270 primers. On the other hand, the Eimeronia primers provided sufficient information to assign each  
271 sequence to a single species, while the sequences amplified with Apicomplexa primers were unable to  
272 differentiate among the *Theileria* species (see also below). We detected sequences identical to  
273 *Plasmodium falciparum* in eight African samples and two Cambodian samples, while sequences most  
274 similar (82.0%-99.5% identity) to bird *Plasmodium* species were amplified from 20 of the 25 traps in  
275 Maryland **(Table 3)**. We also amplified a sequence that was identical to several *Babesia* species (100%  
276 identity) in one trap by two different primer pairs. Finally, we detected DNA from a known  
277 apicomplexan parasite of mosquitoes, *Ascogregarina barretti* (37), in two of the traps.  
278 From all individual mosquitoes, only one Cambodian *Anopheles* yielded a Kinetoplast sequence that was  
279 most similar to *Strigomonas culicis* (96.9% identity). By contrast, 22 of the traps were positive for

280 Kinetoplasts, yielding sequences similar to sequences from *Angomonas*, *Blastocrithidia*, *Blechomonas*,  
281 *Crithidia*, *Leptomonas*, *Paratrypanosoma*, *Strigomonas*, *Trypanosoma*, *Trypanosomatidae*, *Wallaceina* or  
282 *Zelonia* (with 90.3%-100% identity, except for one sequence that matched *Trypanosoma theileri* at  
283 82.7% identity) (**Table 3**).

284 Many sequences were amplified using the Microsporidia primers: 72 African mosquitoes were positive  
285 with sequences similar or identical to *Culicospora*, *Encephalitozoon*, *Hazarida*, *Microsporidium* and  
286 *Parathelohania* (88.3%-100% identity), while 13 Cambodian samples yielded sequences similar or  
287 identical to *Agglomerata*, *Parathelohania* and *Senoma* (91.3%-100% identity) (**Table 3**). Twenty-two  
288 traps also yielded Microsporidia sequences closely matching those of *Amblyospora*, *Andreanna*,  
289 *Culicospora*, *Microsporidium*, *Parathelohania* and *Takaokaspora* (with 76.0%-100% identity).

290 Regarding parasites from the Parabasalia group, four African mosquitoes were positive for  
291 *Tetratrichomona*, *Trichomonas* or *Tritrichomonas* with high sequence similarity (94.8%-100%) while a  
292 single Cambodian mosquito was positive for *Trichomitus* (98.7% identity). No Parabasalia were detected  
293 in the Maryland traps.

294 We detected Platyhelminthes sequences in four African mosquitoes, all similar to *Schistosoma mansoni*  
295 (92.1%-100% identity). Three Cambodian mosquitoes yielded sequences most similar to those of either  
296 *Pleurogenoides* or *Pleurogenes* (94.9%-95.4% identity). Three traps in Maryland were positive for  
297 Platyhelminthes, with sequences most similar to *Haematoloechus* (98.7% identity).

298 The taxonomic resolution of the nematode primers was lower than that of the other taxon-specific  
299 primer pairs and the amplified sequences often matched multiple species (or even genera). We  
300 amplified nematode sequences from 33 African *Anopheles*, including sequences most similar to  
301 *Abursanema*, *Acanthocheilonema*, *Auanema*, *Caenorhabditis*, *Dipetalonema*, *Filarioidea*, *Loa*,  
302 *Loxodontofilaria*, *Madathamugadia*, *Onchocerca*, *Pelecitus*, *Setaria* or *Trichuris*, although the sequence  
303 similarity (95.3-100%) clearly indicated that, in some cases, the exact identity of the species was

304 unknown (see also below). Ten Cambodian mosquitoes were positive for *Setaria digitata* (100% identity)  
305 while other mosquitoes yielded sequences that matched *Setaria* and one or more of the following  
306 genera: *Aproctella*, *Breinlia*, *Dipetalonema*, *Dirofilaria*, *Loa*, *Loxodontofilaria*, *Madathamugadia*,  
307 *Onchocerca*, *Pelecitus*. Nineteen different traps from Maryland produced nematode sequences with  
308 particularly high read counts of *Setaria*, *Yatesia* and *Dirofilaria* sequences (98.9% - 100% identity). Other  
309 genera detected in the traps included *Acanthocheilonema*, *Aproctella*, *Cercopithifilaria*, *Choriorhabditis*,  
310 *Dipetalonema*, *Elaeophora*, *Filarioidea*, *Loa*, *Loxodontofilaria*, *Onchocercidae*.  
311 Overall, using this single assay, we screened over 3,500 mosquitoes from three geographic locations and  
312 identified DNA sequences from numerous microorganisms encompassing six classes, 12 orders and 23  
313 families (**Table 3**).

#### 314 **Identification of Flaviviruses in mosquitoes**

315 To detect and identify flaviviruses, we used a primer pair predicted *in silico* to amplify a wide range of  
316 flaviviruses, including all known human pathogens (25), and we validated that these primers successfully  
317 amplified cDNA generated from West Nile, Zika and Dengue viruses. Out of 665 individual African  
318 mosquitoes, three were positive for viruses most similar to *Anopheles flavivirus variants 1* and *2* (87.2%-  
319 99.1% identity) (**Figure 1 and Supplemental Figure 2**) and one was positive for a virus similar to *Culex*  
320 *flavivirus* (99.1% identity). Seven Maryland traps (24%) were positive for flaviviruses. These viruses were  
321 most similar to the *Calbertado* and *Nienokoue* flaviviruses, although the percent identity was very low  
322 (71.1%-74.3%) and they clearly separated from those viruses in phylogenetic analysis (**Figure 1 and**  
323 **Supplemental Figure 2**). These sequences likely derive from viruses that have not been sequenced yet  
324 but, since that they cluster with other mosquito flaviviruses (**Figure 1 and Supplemental Figure 2**), it is  
325 likely that they represent mosquito-infecting viruses rather than new human pathogens.  
326 One limitation of our study is that the mosquitoes collected in Maryland, USA were, as typical in many  
327 entomological surveys, stored at room temperature upon collection which might have affected RNA

328 preservation. To assess the stability of viral and mosquito RNA in samples stored at room temperature,  
329 we kept pools of colony mosquitoes known to be infected with *Culex flavivirus* at room temperature for  
330 up to four weeks after collection, with and without preservative (ethanol or RNAlater). After RNA  
331 extraction and cDNA synthesis, we determined the amount of mosquito and virus RNA amplifiable using  
332 real-time PCR (see Material and Methods for details). Without preservative, the mosquito RNA was  
333 largely degraded after two weeks (detectable in only one of three replicates) and undetectable after  
334 four weeks (**Supplemental Figure 3**). By comparison, under the same conditions, viral RNA was still  
335 detectable after four weeks (**Supplemental Figure 3**). As expected, when the mosquitoes were  
336 preserved in either ethanol or RNAlater, neither viral nor mosquito RNA showed major change in  
337 concentration over four weeks at room temperature.

### 338 **Follow-up phylogenetic studies**

339 The taxon-specific primers used in the high-throughput sequencing assay were designed to amplify all  
340 members of the chosen group while avoiding off-target amplification and providing as much taxonomic  
341 information as possible. However, these criteria, combined with the requirement for short sequences  
342 (to be sequenceable on a massively parallel sequencer) sometimes limits their resolution.

343 Thus, the Apicomplexa primers amplified multiple *Theileria* sequences but did not distinguish among  
344 species. We therefore amplified a longer DNA sequence (900 bp) of the 18S rRNA locus from the  
345 *Theileria*-positive African and Cambodian mosquitoes and sequenced them using Sanger sequencing  
346 technology. Phylogenetic analysis of these longer sequences, together with known *Theileria* species  
347 sequences deposited in NCBI, showed that the parasites amplified from the Cambodian mosquitoes  
348 were closely related to *T. sinensis*, while those from African mosquitoes were most closely related to *T.*  
349 *velifera* and *T. mutans* (**Figure 2**).

350 We also detected, in several African mosquitoes, filarial worm sequences whose taxonomic assignment  
351 was uncertain. One sequence was 100% identical to both *Loa loa* and *Dipetalonema sp. YQ-2006* (also

352 known as *Mansonella*) while the sequence obtained from the same mosquitoes using a different primer  
353 pair was also most similar to *Dipetalonema* (*Mansonella*) but with 99.2% identity. To clarify the  
354 taxonomy of these sequences, we used PacBio long read technology to sequence 3.5kb of filarial worm  
355 mitochondrial DNA (amplified by long range PCR from these two mosquitoes). We compared these  
356 sequences to known filarial worm mitochondrial DNA sequences and found that these were most similar  
357 to, but distinct from, *Mansonella perstans* (94 and 96 nucleotide differences or ~97.0% identity), while  
358 *Loa loa* was much more distantly related (~83.3% identity) (**Figure 3**). The genetic distance between  
359 *Mansonella perstans* and *Loa loa* in this tree was much higher (519 nucleotide differences, 83.5%  
360 identity) than using short amplicon data where these two sequences were identical, providing greater  
361 confidence in the phylogenetic analysis. We concluded that the filarial worms are most likely either  
362 *Mansonella perstans* or a very closely related species.

### 363 **Analysis of individual vs pooled mosquitoes**

364 We analyzed both individual mosquitoes and pools of 50-291 mosquitoes. For the pools, 23 out of the  
365 25 produced sequences demonstrating that the amplification of pools of up to 291 mosquitoes is  
366 feasible without significant PCR inhibition. Out of the 930 individual mosquitoes, 162 (17.4%) had at  
367 least ten reads from one or more parasites or arboviruses. By comparison, 23 out of the 25 traps (92%)  
368 yielded such sequences, meaning that fewer samples needed to be screened to detect pathogens when  
369 samples were pooled. Note however that the individual mosquitoes and the CDC traps were not  
370 collected from the same geographic locations and this could possibly confound the results described.

### 371 **Analysis of DNA vs. RNA extracted from the same mosquito traps**

372 All primers used for detecting parasites and viruses are located within single-exon genes and can amplify  
373 either DNA or cDNA with the same efficiency. However, the PCRs target genes that are typically highly  
374 expressed (e.g., ribosomal RNA genes) and we would therefore expect many more copies of RNA than  
375 DNA per cell, (although this could be diminished by the faster degradation of RNA molecules compared



376 to DNA). To evaluate the relative sensitivity of our assay for screening DNA and RNA, we compared the  
377 results obtained by analyzing matched DNA and RNA isolated from the same mosquito pools. We found  
378 that for Spirurida, Kinetoplast, Microsporidia and *Plasmodium* PCR assays, 62.2% of the sequences  
379 identified were detected only in the cDNA sample and not in the corresponding DNA sample from the  
380 same trap. For those cases where a sequence was detected in both cDNA and DNA from a given trap,  
381 the cDNA yielded more reads in 89 of 119 instances (with, on average, 24.5-fold more reads). Read  
382 counts were higher in the DNA for only 29 of 119 cases with an average fold difference of 2.8 (one had  
383 equal read counts in cDNA and DNA). Out of these 29 cases, 22 (75.9%) of the sequences were most  
384 similar to *Trypanosoma* species despite these sequences representing only 17.4 of all sequences. On  
385 average, the cDNA samples produced 258 – 1,169 more reads per hit than the matching DNA samples  
386 (**Figure 3**), despite the storage of the samples at room temperature without preservative for more than  
387 24 hours.

388

## 389 **Discussion**

390 Vector-borne disease surveillance is an essential component of infectious disease control as it can  
391 enable rapid detection of outbreaks and guide targeted elimination efforts (e.g., through insecticide  
392 spraying). However, current approaches are extremely demanding in regards to human and financial  
393 resources, both for the sample collection and the identification of potential pathogens. Consequently,  
394 public health officials and vector biologists often have to focus on a handful of parasites associated with  
395 the most current threats. Current detection approaches also often lead to duplicated efforts, as  
396 different agencies interested in specific pathogens perform sample collection independently and have a  
397 high risk of failing to detect emerging pathogens until they cause outbreaks. Here, we describe  
398 application of a genomic assay that allows identification of a wide range of pathogens that can cause

399 human and animal diseases, as well as of parasites of the vector that could potentially be useful as  
400 biological controls.

401 The analyses of several hundred mosquitoes collected in Cambodia, Mali, Guinea and Maryland revealed  
402 well-known human pathogens including *P. falciparum*, which was the target of the initial study of the  
403 Cambodian samples (24). In addition, we detected *Theileria* species and *Setaria digitata*, which cause  
404 livestock diseases in Southeast Asia (38-42). While we were initially unable to conclusively determine  
405 the exact *Theileria* species with our initial assay, targeted follow-up studies using longer amplicons and  
406 Sanger sequencing (**Figure 2**) revealed that the sequences amplified from the African mosquitoes were  
407 most closely related to *T. velifera* and *T. mutans*, which are both known to infect African cattle (43),  
408 whereas the Cambodian mosquitoes carried sequences most closely related to *T. sinensis*, a species that  
409 infects cattle in China (44).

410 *Theileria* parasites are transmitted by ticks, not mosquitoes, and the DNA sequences recovered likely  
411 derive from parasites taken up by the mosquitoes during a blood meal but likely not transmissible to  
412 another hosts. The *Schistosoma* species detected in mosquitoes from Africa also likely result from  
413 parasites present in a bloodmeal. In this regard, it is interesting to note that when one considers the  
414 samples collected in Maryland and analyzed with both DNA and RNA, the read counts (a proxy for the  
415 abundance of extracted molecules) for transmissible parasites (e.g., *Plasmodium*) or parasites of the  
416 mosquitoes (e.g., *Crithidia*, *Strigomonas* and *Takaokaspora*) were typically higher in the RNA samples  
417 than in the matched DNA samples while the opposite was true for parasites “sampled” during the blood  
418 meal but unlikely to develop in *Anopheles* mosquitoes (e.g., *Theileria*, *Trypanosoma*) (**Figure 4**,  
419 **Supplemental Figure 4 and Supplemental Table 6**). We speculate that this difference is due to the  
420 difference between developing, live, parasites still synthesizing RNA molecules and dead (possibly  
421 digested) parasites for which the RNA is slowly being degraded. Comparison of DNA and RNA from the

422 same mosquito could perhaps provide a tool to differentiate transmissible parasites from those sampled  
423 by the vector.

424 We also identified, in two African mosquitoes, sequences similar to known filarial worms but identical to  
425 multiple sequences present in the database. Using this information, we characterized longer DNA  
426 sequences and showed that these two mosquitoes likely carried *Mansonella perstans* parasites. Since  
427 the PCR primers are designed to amplify any member of the selected taxa, they can reveal the presence  
428 of novel pathogens as long as they are phylogenetically related to known parasites. This feature is a key  
429 advantage of our assay for vector-borne disease surveillance as it may enable early detection of  
430 emerging pathogens and zoonoses and provide a basis for rapid response.

431 In addition to known human parasites and potential emerging pathogens, this single-stop assay also  
432 provides another source of information valuable for vector-borne disease control: 9% of the individual  
433 mosquitoes and 62% of pooled mosquito samples screened yielded sequences of microsporidians  
434 related to well-characterized arthropod parasites, which could potentially be used to guide the  
435 development of targeted biological vector control. This ability to detect multiple parasites at once in a  
436 high-throughput manner and across a wide range of taxonomical groups could reduce duplication of  
437 collection efforts and costs, as mosquitoes collected for one purpose could be screened for many  
438 parasites affecting both humans and animals. In addition, comprehensive characterization of the  
439 parasites present in a given mosquito may also improve our understanding of the general factors  
440 regulating infection and transmission: several studies have shown that immunity and previous infections  
441 can influence the response of mosquitoes to human parasites and their transmission (45-47) and  
442 information of current infections of wild-caught mosquitoes could, for example, significantly improve  
443 our assessment of their vector capacity.

444 Several of the infectious diseases that have recently caused major public health challenges by spreading  
445 outside of their typical range(7, 8) or emerging as novel human infectious diseases(5, 6), are caused by

446 viruses transmitted by mosquitoes. We therefore extended our assay to capture, using the same  
447 approach as for eukaryotic parasites, both known and novel flaviviruses. Since flaviviruses are RNA  
448 viruses and RNA degrades much faster than DNA, we first examined how nucleic acid degradation  
449 influenced our ability to detect virus over time. To test RNA preservation, we collected mosquitoes  
450 known to carry *Culex flavivirus* and isolated RNA from pools of five mosquitoes, either immediately  
451 frozen or kept at room temperature for two or four weeks, with either no preservative, ethanol or  
452 RNAlater. The mosquitoes stored in preservatives had minimal loss of viral (and mosquito) RNAs as  
453 determined by qRT-PCR (**Supplemental Figure 3**). Even when stored without preservatives, viral RNA  
454 were detectable after 4 weeks at room temperature (although with a reduction of, on average, 10.7 PCR  
455 cycles), demonstrating a remarkable stability of the RNA, possibly due to protection provided by the  
456 viral capsid (by contrast very little mosquito RNA remained amplifiable after two weeks at room  
457 temperature, **Supplemental Figure 3**). As a proof-of-principle and to demonstrate the potential of this  
458 approach for viral disease surveillance, we screened the Maryland mosquito pools and the individual  
459 African mosquitoes for flaviviruses. We identified several viruses, distinct from known viruses (**Figure 1**)  
460 and, based on their phylogenic position, likely to infect mosquitoes rather than humans.

461 Based on the results described above, we believe that this single high-throughput assay can provide a  
462 wide range of information critical for vector-borne disease researchers and public health officials.  
463 However, several limitations need to be noted. One caveat is that, whereas false positive detection of a  
464 species is highly unlikely (aside from laboratory cross-contamination), several factors could lead to false  
465 negatives. Thus, while the primers were designed to amplify all known sequences of a given taxon as  
466 effectively as possible, nucleotide differences at the primer binding sites could prevent efficient  
467 amplification of a specific species. This potential problem could be particularly problematic if several  
468 related parasites are present in the same sample but are differentially amplified: for example, it could  
469 be possible that a *Plasmodium* parasite might be mis-detected if the sequences generated by an

470 Apicomplexan primer pair are out competed by *Theileria* sequences. Similarly, poor preservation of the  
471 nucleic acids in one sample could also lead to false negatives. False negatives could also occur for  
472 stochastic reasons: if only a few parasite cells are present in one sample (*e.g.*, an *Anopheles* mosquito  
473 infected by a *Plasmodium* ookinete) it is possible that no DNA will be present in the PCR reaction  
474 (especially if the extract gets divided across many reactions). One approach to circumvent this limitation  
475 could be to test cDNA instead of DNA (48, 49): our analyses of the Maryland mosquitoes showed that,  
476 for many primer sets, amplification of cDNA resulted in higher read counts than amplification of DNA  
477 extracted from the same samples, despite the sub-optimal preservation of these samples. Another  
478 limitation is the specificity of taxonomic assignment. As discussed above, if the sequenced amplicon  
479 does not contain enough information to distinguish similar species, subsequent experiments may be  
480 required to confirm pathogen identity for important detection events.

481 Finally, we showed that analyses of fairly large pools of mosquitoes (up to ~300 mosquitoes) were  
482 possible with our assay. This feature could be extremely useful in specific situations, such as for  
483 efficiently detecting emerging pathogens, monitoring the spread of pathogens into new regions, or for  
484 validating the success of elimination control programs.

485

## 486 **Conclusion**

487 This study demonstrates how our high-throughput, one-stop assay could efficiently complement current  
488 toolkits to prevent vector-borne diseases by providing a comprehensive description of known and  
489 emerging human viruses and parasites, informing on animal pathogens that could affect a region's  
490 economy, and indicating possible biological control candidates that could be used against these disease  
491 vectors. One additional feature of this sequencing-based assay is the ease of customizing it to different  
492 settings and research questions. Since the assay relies on PCR primers, it is straightforward to add and

493 remove primers for specific taxa of interest, or to combine them with additional PCRs to characterize,  
494 for example, the source of the blood meal (27).

#### 495 **Acknowledgements**

496 We wish to thank our collaborators at the National Center for Parasitology, Entomology, and Malaria  
497 Control (CNM) in Phnom Penh, Stop Palu and the National Malaria Control Program in Guinea and at the  
498 Malaria Research and Training Center, University of Science, Techniques and Technologies, Bamako,  
499 Mali for their help with the sample collection and processing, as well as Erin Haser, Rachel Koch, Jessica  
500 Moskowitz, Rachel Shuck, and Elizabeth Allan. We also thank Stop Palu (RTI), the U.S. President's  
501 Malaria Initiative, and all those participating in collections for support in the sample collection and  
502 processing in Guinea. The findings and conclusions in this report are those of the authors and do not  
503 necessarily represent the official position of the Centers for Disease Control and Prevention.

#### 504 **Conflict of interest statement:**

505 The authors have stated explicitly that there are no conflicts of interest in connection with this article.

#### 506 **Author contributions**

507 MVC, BSTL, MF and DS designed the study. BSTL, MF, KK, DC, YB, MK, DC, AKK, OKD, MAT, CVP, MT, SI,  
508 JD and BP collected and/or provided access to the mosquito samples. MVC, HB, BSTL and DB performed  
509 the laboratory experiments. MVC analyzed the data. MVC and DS prepared the manuscript. All authors  
510 read and approved the final manuscript.

#### 511 **Availability of data and material**

512 The datasets generated for the current study are available in the NCBI SRA repository (Accession  
513 numbers SRR12797126 - SRR12797220, SRR12797360 - SRR12797683, SRR12796164 - SRR12796923 and  
514 SAMN16182375 - SAMN16183134)

#### 515 **Funding**

516 This study was supported by DS and by the Intramural Research Program (NIAID-NIH) to BSTL. SRI was  
517 funded by the U.S. President's Malaria Initiative.  
518

## 519 References

- 520 1. Ecker, D. J., Sampath, R., Willett, P., Wyatt, J. R., Samant, V., Massire, C., Hall, T. A., Hari, K.,  
521 McNeil, J. A., Buchen-Osmond, C., and Budowle, B. (2005) The Microbial Rosetta Stone  
522 Database: a compilation of global and emerging infectious microorganisms and bioterrorist  
523 threat agents. *BMC microbiology* **5**, 19
- 524 2. WHO. (2017) Vector-borne diseases. In *Fact sheet* (Organization, W. H., ed)
- 525 3. (2008) In *Vector-Borne Diseases: Understanding the Environmental, Human Health, and*  
526 *Ecological Connections, Workshop Summary*, Washington (DC)
- 527 4. Collaborators, G. B. D. M. (2018) Global, regional, and national age-sex-specific mortality and life  
528 expectancy, 1950-2017: a systematic analysis for the Global Burden of Disease Study 2017.  
529 *Lancet* **392**, 1684-1735
- 530 5. Gorshkov, K., Shiryayev, S. A., Fertel, S., Lin, Y. W., Huang, C. T., Pinto, A., Farhy, C., Strongin, A. Y.,  
531 Zheng, W., and Terskikh, A. V. (2018) Zika Virus: Origins, Pathological Action, and Treatment  
532 Strategies. *Frontiers in microbiology* **9**, 3252
- 533 6. Liu, Z. Y., Shi, W. F., and Qin, C. F. (2019) The evolution of Zika virus from Asia to the Americas.  
534 *Nat Rev Microbiol* **17**, 131-139
- 535 7. Higuera, A., and Ramirez, J. D. (2019) Molecular epidemiology of dengue, yellow fever, Zika and  
536 Chikungunya arboviruses: An update. *Acta Trop.* **190**, 99-111
- 537 8. Sejvar, J. J. (2016) West Nile Virus Infection. *Microbiol Spectr* **4**
- 538 9. McCall, J. W., Genchi, C., Kramer, L. H., Guerrero, J., and Venco, L. (2008) Heartworm disease in  
539 animals and humans. *Adv. Parasitol.* **66**, 193-285
- 540 10. Otranto, D., Dantas-Torres, F., Brianti, E., Traversa, D., Petric, D., Genchi, C., and Capelli, G.  
541 (2013) Vector-borne helminths of dogs and humans in Europe. *Parasit Vectors* **6**, 16
- 542 11. Nene, V., Kiara, H., Lacasta, A., Pelle, R., Svitek, N., and Steinaa, L. (2016) The biology of *Theileria*  
543 *parva* and control of East Coast fever - Current status and future trends. *Ticks Tick Borne Dis* **7**,  
544 549-564
- 545 12. Gachohi, J., Skilton, R., Hansen, F., Ngumi, P., and Kitala, P. (2012) Epidemiology of East Coast  
546 fever (*Theileria parva* infection) in Kenya: past, present and the future. *Parasit Vectors* **5**, 194
- 547 13. Clark, N. J., Clegg, S. M., and Lima, M. R. (2014) A review of global diversity in avian  
548 haemosporidians (*Plasmodium* and *Haemoproteus*: Haemosporida): new insights from  
549 molecular data. *Int. J. Parasitol.* **44**, 329-338
- 550 14. Lapointe, D. A., Atkinson, C. T., and Samuel, M. D. (2012) Ecology and conservation biology of  
551 avian malaria. *Ann. N. Y. Acad. Sci.* **1249**, 211-226
- 552 15. Cox-Singh, J., Davis, T. M., Lee, K. S., Shamsul, S. S., Matusop, A., Ratnam, S., Rahman, H. A.,  
553 Conway, D. J., and Singh, B. (2008) *Plasmodium knowlesi* malaria in humans is widely distributed  
554 and potentially life threatening. *Clin. Infect. Dis.* **46**, 165-171
- 555 16. Daneshvar, C., William, T., and Davis, T. M. E. (2018) Clinical features and management of  
556 *Plasmodium knowlesi* infections in humans. *Parasitology* **145**, 18-31
- 557 17. White, N. J. (2008) *Plasmodium knowlesi*: the fifth human malaria parasite. *Clin. Infect. Dis.* **46**,  
558 172-173
- 559 18. Brasil, P., Zalis, M. G., de Pina-Costa, A., Siqueira, A. M., Junior, C. B., Silva, S., Areas, A. L. L.,  
560 Pelajo-Machado, M., de Alvarenga, D. A. M., da Silva Santelli, A. C. F., Albuquerque, H. G., Cravo,  
561 P., Santos de Abreu, F. V., Peterka, C. L., Zanini, G. M., Suarez Mutis, M. C., Pissinatti, A.,  
562 Lourenco-de-Oliveira, R., de Brito, C. F. A., de Fatima Ferreira-da-Cruz, M., Culleton, R., and  
563 Daniel-Ribeiro, C. T. (2017) Outbreak of human malaria caused by *Plasmodium simium* in the  
564 Atlantic Forest in Rio de Janeiro: a molecular epidemiological investigation. *Lancet Glob Health*  
565 **5**, e1038-e1046



- 566 19. McCarthy, J., and Moore, T. A. (2000) Emerging helminth zoonoses. *Int. J. Parasitol.* **30**, 1351-  
567 1360
- 568 20. Cutler, S. J., Fooks, A. R., and van der Poel, W. H. (2010) Public health threat of new, reemerging,  
569 and neglected zoonoses in the industrialized world. *Emerg. Infect. Dis.* **16**, 1-7
- 570 21. Benelli, G., and Beier, J. C. (2017) Current vector control challenges in the fight against malaria.  
571 *Acta Trop.* **174**, 91-96
- 572 22. Walker, K., and Lynch, M. (2007) Contributions of Anopheles larval control to malaria  
573 suppression in tropical Africa: review of achievements and potential. *Med. Vet. Entomol.* **21**, 2-  
574 21
- 575 23. Cannon, M. V., Bogale, H., Rutt, L., Humphrys, M., Korpe, P., Duggal, P., Ravel, J., and Serre, D.  
576 (2018) A high-throughput sequencing assay to comprehensively detect and characterize  
577 unicellular eukaryotes and helminths from biological and environmental samples. *Microbiome* **6**,  
578 195
- 579 24. St Laurent, B., Oy, K., Miller, B., Gasteiger, E. B., Lee, E., Sovannaroth, S., Gwadz, R. W.,  
580 Anderson, J. M., and Fairhurst, R. M. (2016) Cow-baited tents are highly effective in sampling  
581 diverse Anopheles malaria vectors in Cambodia. *Malar J* **15**, 440
- 582 25. Patel, P., Landt, O., Kaiser, M., Faye, O., Koppe, T., Lass, U., Sall, A. A., and Niedrig, M. (2013)  
583 Development of one-step quantitative reverse transcription PCR for the rapid detection of  
584 flaviviruses. *Virology* **10**, 58
- 585 26. Cannon, M. V., Hester, J., Shalkhauser, A., Chan, E. R., Logue, K., Small, S. T., and Serre, D. (2016)  
586 In silico assessment of primers for eDNA studies using PrimerTree and application to  
587 characterize the biodiversity surrounding the Cuyahoga River. *Scientific reports* **6**, 22908
- 588 27. Logue, K., Keven, J. B., Cannon, M. V., Reimer, L., Siba, P., Walker, E. D., Zimmerman, P. A., and  
589 Serre, D. (2016) Unbiased Characterization of Anopheles Mosquito Blood Meals by Targeted  
590 High-Throughput Sequencing. *PLoS Negl Trop Dis* **10**, e0004512
- 591 28. Masella, A. P., Bartram, A. K., Truszkowski, J. M., Brown, D. G., and Neufeld, J. D. (2012)  
592 PANDAseq: paired-end assembler for illumina sequences. *BMC bioinformatics* **13**, 31
- 593 29. Altschul, S. F., Gish, W., Miller, W., Myers, E. W., and Lipman, D. J. (1990) Basic local alignment  
594 search tool. *J. Mol. Biol.* **215**, 403-410
- 595 30. Katoh, K., and Standley, D. M. (2013) MAFFT multiple sequence alignment software version 7:  
596 improvements in performance and usability. *Mol. Biol. Evol.* **30**, 772-780
- 597 31. Tamura, K., Stecher, G., Peterson, D., Filipowski, A., and Kumar, S. (2013) MEGA6: Molecular  
598 Evolutionary Genetics Analysis version 6.0. *Mol. Biol. Evol.* **30**, 2725-2729
- 599 32. Magoc, T., and Salzberg, S. L. (2011) FLASH: fast length adjustment of short reads to improve  
600 genome assemblies. *Bioinformatics* **27**, 2957-2963
- 601 33. Katoh, K., Rozewicki, J., and Yamada, K. D. (2017) MAFFT online service: multiple sequence  
602 alignment, interactive sequence choice and visualization. *Brief Bioinform*
- 603 34. Kumar, S., Stecher, G., and Tamura, K. (2016) MEGA7: Molecular Evolutionary Genetics Analysis  
604 Version 7.0 for Bigger Datasets. *Mol. Biol. Evol.* **33**, 1870-1874
- 605 35. Untergasser, A., Cutcutache, I., Koressaar, T., Ye, J., Faircloth, B. C., Remm, M., and Rozen, S. G.  
606 (2012) Primer3--new capabilities and interfaces. *Nucleic Acids Res* **40**, e115
- 607 36. Kumar, S., Stecher, G., Li, M., Nnyaz, C., and Tamura, K. (2018) MEGA X: Molecular Evolutionary  
608 Genetics Analysis across Computing Platforms. *Mol. Biol. Evol.* **35**, 1547-1549
- 609 37. Siegel, J. P., Novak, R. J., and Maddox, J. V. (1992) Effects of *Ascogregarina barretti*  
610 (*Eugregarinida*: *Lecudinidae*) infection on *Aedes triseriatus* (Diptera: *Culicidae*) in Illinois. *J. Med.*  
611 *Entomol.* **29**, 968-973

- 612 38. Nakano, H., Tozuka, M., Ikadai, H., Ishida, H., Goto, R., Kudo, N., Katayama, Y., Muranaka, M.,  
613 Anzai, T., and Oyamada, T. (2007) Morphological survey of bovine *Setaria* in the abdominal  
614 cavities of cattle in Aomori and Kumamoto Prefectures, Japan. *J. Vet. Med. Sci.* **69**, 413-415
- 615 39. Weerasooriya, G., Sivakumar, T., Lan, D. T., Long, P. T., Takemae, H., Igarashi, I., Inoue, N., and  
616 Yokoyama, N. (2016) Epidemiology of bovine hemoprotozoa parasites in cattle and water  
617 buffalo in Vietnam. *J. Vet. Med. Sci.* **78**, 1361-1367
- 618 40. Bawm, S., Shimizu, K., Hirota, J., Tosa, Y., Htun, L. L., Maw, N. N., Thein, M., Kato, H., Sakurai, T.,  
619 and Katakura, K. (2014) Molecular prevalence and genetic diversity of bovine *Theileria orientalis*  
620 in Myanmar. *Parasitol Int* **63**, 640-645
- 621 41. Liu, G. H., Li, J. Y., and Zhu, X. Q. (2017) Characterization of the complete mitochondrial genome  
622 of *Setaria digitata* (Nematoda: Setariidae) from China. *J. Helminthol.* **91**, 772-776
- 623 42. Shin, S. S., Cho, K. O., and Wee, S. H. (2002) Ocular infection of cattle with *Setaria digitata*. *J. Vet.*  
624 *Med. Sci.* **64**, 7-10
- 625 43. Mans, B. J., Pienaar, R., and Latif, A. A. (2015) A review of *Theileria* diagnostics and  
626 epidemiology. *Int J Parasitol Parasites Wildl* **4**, 104-118
- 627 44. Liu, A., Guan, G., Liu, Z., Liu, J., Leblanc, N., Li, Y., Gao, J., Ma, M., Niu, Q., Ren, Q., Bai, Q., Yin, H.,  
628 and Luo, J. (2010) Detecting and differentiating *Theileria sergenti* and *Theileria sinensis* in cattle  
629 and yaks by PCR based on major piroplasm surface protein (MPSP). *Exp. Parasitol.* **126**, 476-481
- 630 45. Cirimotich, C. M., Dong, Y., Garver, L. S., Sim, S., and Dimopoulos, G. (2010) Mosquito immune  
631 defenses against *Plasmodium* infection. *Dev. Comp. Immunol.* **34**, 387-395
- 632 46. Bian, G., Joshi, D., Dong, Y., Lu, P., Zhou, G., Pan, X., Xu, Y., Dimopoulos, G., and Xi, Z. (2013)  
633 *Wolbachia* invades *Anopheles stephensi* populations and induces refractoriness to *Plasmodium*  
634 infection. *Science* **340**, 748-751
- 635 47. Meister, S., Kanzok, S. M., Zheng, X. L., Luna, C., Li, T. R., Hoa, N. T., Clayton, J. R., White, K. P.,  
636 Kafatos, F. C., Christophides, G. K., and Zheng, L. (2005) Immune signaling pathways regulating  
637 bacterial and malaria parasite infection of the mosquito *Anopheles gambiae*. *Proc. Natl. Acad.*  
638 *Sci. U. S. A.* **102**, 11420-11425
- 639 48. Kamau, E., Tolbert, L. S., Kortepeter, L., Pratt, M., Nyakoe, N., Muringo, L., Ogutu, B., Waitumbi,  
640 J. N., and Ockenhouse, C. F. (2011) Development of a highly sensitive genus-specific quantitative  
641 reverse transcriptase real-time PCR assay for detection and quantitation of *plasmodium* by  
642 amplifying RNA and DNA of the 18S rRNA genes. *J. Clin. Microbiol.* **49**, 2946-2953
- 643 49. Adams, M., Joshi, S. N., Mbambo, G., Mu, A. Z., Roemmich, S. M., Shrestha, B., Strauss, K. A.,  
644 Johnson, N. E., Oo, K. Z., Hlaing, T. M., Han, Z. Y., Han, K. T., Thura, S., Richards, A. K., Huang, F.,  
645 Nyunt, M. M., and Plowe, C. V. (2015) An ultrasensitive reverse transcription polymerase chain  
646 reaction assay to detect asymptomatic low-density *Plasmodium falciparum* and *Plasmodium*  
647 *vivax* infections in small volume blood samples. *Malar J* **14**, 520
- 648 50. Habibi, G. (2012) Phylogenetic Analysis of *Theileria annulata* Infected Cell Line S15 Iran Vaccine  
649 Strain. *Iran J Parasitol* **7**, 73-81

650

651

652 **Tables**

653 **Table 1. Sample summary.**

| <b>Origin</b>   | <b>Number</b>   | <b>Genera</b>                                                                   | <b>Nucleic acids analyzed</b> |
|-----------------|-----------------|---------------------------------------------------------------------------------|-------------------------------|
| Cambodia        | 265 individuals | <i>Anopheles</i>                                                                | DNA                           |
| Guinea and Mali | 665 individuals | <i>Anopheles</i>                                                                | DNA/RNA                       |
| Maryland, USA   | 25 pools        | <i>Aedes, Anopheles, Culex, Culiseta, Ochlerotatus, Psorophora, Uranotaenia</i> | DNA/RNA                       |

654

655

656 **Table 2. Primers used.**

| <b>Taxon targeted</b>        | <b>Name</b>            | <b>Forward Primer</b>      | <b>Reverse Primer</b>     | <b>Amplicon Length</b> |
|------------------------------|------------------------|----------------------------|---------------------------|------------------------|
| Apicomplexa (primers A) (23) | Apicomp18S_365-613     | GACCTATCAGCTTTGACGG        | CCCTCCAATTGWTACTCTGGR     | 244–248                |
| Apicomplexa (primers B) (23) | Plasmo18S_883-1126     | TGYGTTTGAATACTAYAGCATGG    | TCTGATCGTCTTCACTCCCTT     | 228–244                |
| Apicomplexa (primers C) (23) | Eimeriorina18S_302-730 | TTGGMCTACCGTGGCARTGA       | TCAAGGCAAHWGCCTGCTT       | 420–470                |
| Kinetoplastida (23)          | Kineto_18S4            | AAATTAACCGCACGCTCCA        | GCAAACGATGACACCCATGA      | 250–300                |
| Microsporidia (23)           | Microsporidia_18S      | BCAGGTTGATTCTGCCTGACR      | ACCAGWCTTGCCCTCCARTT      | 370–440                |
| Parabasalia (23)             | Parab18S_288-654       | TAGGCTATCACGGGTAACGG       | GCGTCCTGATTTGTTACAG       | 326–364                |
| Platyhelminthes (23)         | Platy_18S3             | CAATTGGAGGGCAAGTCTGG       | TGCTTTCGCWKTAGTTTGTCTG    | 350–550                |
| Nematode (primers A) (23)    | Spirur18S_1435-1858    | CACCCGTGAGGATTGACAG        | CGATCACGGAGGATTTCAA       | 320–335                |
| Nematode (primers B) (23)    | Spirurida_18S2         | CGTCATTGCTGCGGTTAAAA       | CCGTCCTTCGAACCTCTGAC      | 380–410                |
| Nematode (primers C) (23)    | Tricho_18S2            | AGTGGAGCATGCGGCTTAAT       | TGCAATCCCTRTRCCAGTC       | 380–440                |
| Flavivirus (25)              | FlaviallS_FlaviallAS2  | TACAACATGATGGGGAARAGAGARAA | GTGTCCCAGCCNGCKGTGCATCWGC | 263–266                |
| Theileria (50)               | Theileria              | GGCGGCGTTTATTAGACC         | TCAATTCCTTAAGTTTCAGCC     | 894–1045               |
| Filarial (long range PCR)    | Filarial               | TTCGTCGTGAGACAGAGCGG       | AGGCCATTGACGGATGGTTTGTAC  | 3500                   |

657

658 **Table 3. Genera amplified from each group of samples.**

| Target                | Genus                                                                 | Maryland  |           |           | Identity       |
|-----------------------|-----------------------------------------------------------------------|-----------|-----------|-----------|----------------|
|                       |                                                                       | Pools     | Africa    | Cambodia  |                |
| <b>Apicomplexa</b>    |                                                                       | <b>21</b> | <b>31</b> | <b>17</b> |                |
|                       | <i>Ascogregarina</i>                                                  | 2         | 0         | 0         | 100.00%        |
|                       | <i>Babesia</i>                                                        | 1         | 0         | 0         | 100.00%        |
|                       | <i>Cryptosporidium</i>                                                | 0         | 1         | 0         | 92.08%         |
|                       | <i>Hepatocystis</i>                                                   | 1         | 0         | 0         | 85.45%         |
|                       | <i>Hepatocystis/Plasmodium</i>                                        | 4         | 0         | 0         | 93.50%         |
|                       | <i>Paraschneideria</i>                                                | 1         | 0         | 0         | 91.63%         |
|                       | <i>Plasmodium</i>                                                     | 20        | 8         | 2         | 82.02%-100.00% |
|                       | <i>Theileria</i>                                                      | 7         | 22        | 15        | 99.10%-100.00% |
| <b>Kinetoplastida</b> |                                                                       | <b>22</b> | <b>0</b>  | <b>1</b>  |                |
|                       | <i>Angomonas/Crithidia</i>                                            | 5         | 0         | 0         | 99.56%-100.00% |
|                       | <i>Blastocrithidia</i>                                                | 1         | 0         | 0         | 98.27%         |
|                       | <i>Blastocrithidia/Crithidia/Leptomonas/Wallaceina</i>                | 4         | 0         | 0         | 100.00%        |
|                       | <i>Blechnomonas</i>                                                   | 2         | 0         | 0         | 90.27%-91.44%  |
|                       | <i>Crithidia</i>                                                      | 15        | 0         | 0         | 99.13%-100.00% |
|                       | <i>Crithidia/Trypanosomatidae</i>                                     | 6         | 0         | 0         | 100.00%        |
|                       | <i>Paratrypanosoma</i>                                                | 2         | 0         | 0         | 94.86%         |
|                       | <i>Strigomonas</i>                                                    | 8         | 0         | 1         | 96.89%-100.00% |
|                       | <i>Trypanosoma</i>                                                    | 22        | 0         | 0         | 82.70%-100.00% |
|                       | <i>Zelonia</i>                                                        | 1         | 0         | 0         | 98.71%         |
| <b>Flaviviridae</b>   |                                                                       | <b>7</b>  | <b>4</b>  | <b>0</b>  |                |
|                       | <i>Aedes flavivirus/Calbertado virus</i>                              | 1         | 0         | 0         | 74.26%         |
|                       | <i>Anopheles flavivirus</i>                                           | 0         | 3         | 0         | 87.20%-99.06%  |
|                       | <i>Calbertado virus</i>                                               | 7         | 0         | 0         | 71.09%-74.26%  |
|                       | <i>Culex flavivirus</i>                                               | 0         | 1         | 0         | 99.06%         |
|                       | <i>Nienokoue virus</i>                                                | 1         | 0         | 0         | 72.99%         |
| <b>Microsporidia</b>  |                                                                       | <b>22</b> | <b>72</b> | <b>13</b> |                |
|                       | <i>Agglomerata</i>                                                    | 0         | 0         | 3         | 96.23%-96.52%  |
|                       | <i>Amblyospora</i>                                                    | 2         | 0         | 0         | 94.41%         |
|                       | <i>Andreanna</i>                                                      | 1         | 0         | 0         | 76.01%         |
|                       | <i>Culicospora</i>                                                    | 1         | 6         | 0         | 99.70%-100.00% |
|                       | <i>Encephalitozoon</i>                                                | 0         | 6         | 0         | 100.00%        |
|                       | <i>Hazardia</i>                                                       | 0         | 1         | 0         | 97.08%         |
|                       | <i>Microsporidium</i>                                                 | 7         | 34        | 0         | 88.29%-97.31%  |
|                       | <i>Parathelohania</i>                                                 | 5         | 28        | 10        | 91.27%-100.00% |
|                       | <i>Senoma</i>                                                         | 0         | 0         | 3         | 94.20%         |
|                       | <i>Takaokaspora</i>                                                   | 14        | 0         | 0         | 94.61%-94.94%  |
| <b>Nematoda</b>       |                                                                       | <b>19</b> | <b>33</b> | <b>10</b> |                |
|                       | <i>Abursanema</i>                                                     | 0         | 1         | 0         | 95.34%         |
|                       | <i>Acanthocheilonema</i>                                              | 3         | 13        | 0         | 100.00%        |
|                       | <i>Aproctella</i>                                                     | 2         | 0         | 0         | 100.00%        |
|                       | <i>Aproctella/Setaria</i>                                             | 1         | 0         | 3         | 99.64%         |
|                       | <i>Auanema</i>                                                        | 0         | 1         | 0         | 98.21%         |
|                       | <i>Brelinia/Dipetalonema/Dirofilaria/Onchocerca/Pelecitus/Setaria</i> | 0         | 0         | 6         | 99.64%         |
|                       | <i>Caenorhabditis</i>                                                 | 0         | 1         | 0         | 100.00%        |
|                       | <i>Cercopithifilaria</i>                                              | 2         | 0         | 0         | 100.00%        |
|                       | <i>Choriorhabditis</i>                                                | 1         | 0         | 0         | 99.71%         |
|                       | <i>Dipetalonema</i>                                                   | 4         | 3         | 0         | 98.68%-99.20%  |
|                       | <i>Dipetalonema/Loa</i>                                               | 0         | 7         | 0         | 100.00%        |

|                        |                                                  |          |          |          |                |
|------------------------|--------------------------------------------------|----------|----------|----------|----------------|
|                        | <i>Dipetalonema/Loa/Loxodontofilaria/Yatesia</i> | 1        | 0        | 0        | 99.64%         |
|                        | <i>Dipetalonema/Loa/Madathamugadia</i>           | 0        | 2        | 0        | 99.64%         |
|                        | <i>Dipetalonema/Loa/Onchocerca</i>               | 0        | 2        | 0        | 99.64%         |
|                        | <i>Dipetalonema/Loa/Pelecitus</i>                | 0        | 1        | 0        | 99.64%         |
|                        | <i>Dipetalonema/Loa/Setaria</i>                  | 2        | 0        | 6        | 99.64%         |
|                        | <i>Dirofilaria</i>                               | 1        | 0        | 0        | 100.00%        |
|                        | <i>Dirofilaria/Onchocercidae</i>                 | 1        | 0        | 0        | 99.44%         |
|                        | <i>Elaeophora/Setaria</i>                        | 1        | 0        | 0        | 99.44%         |
|                        | <i>Filarioidea</i>                               | 5        | 3        | 0        | 100.00%        |
|                        | <i>Loxodontofilaria</i>                          | 1        | 0        | 0        | 100.00%        |
|                        | <i>Loxodontofilaria/Setaria</i>                  | 0        | 0        | 5        | 99.64%         |
|                        | <i>Madathamugadia/Setaria</i>                    | 0        | 0        | 6        | 99.64%         |
|                        | <i>Onchocerca/Setaria</i>                        | 0        | 0        | 6        | 99.64%         |
|                        | <i>Setaria</i>                                   | 13       | 13       | 10       | 98.94%-100.00% |
|                        | <i>Trichuris</i>                                 | 0        | 1        | 0        | 99.77%         |
|                        | <i>Yatesia</i>                                   | 8        | 0        | 0        | 100.00%        |
| <b>Parabasalia</b>     |                                                  | <b>0</b> | <b>4</b> | <b>1</b> |                |
|                        | <i>Tetratrichomonas</i>                          | 0        | 3        | 0        | 99.69%-100.00% |
|                        | <i>Trichomitus</i>                               | 0        | 0        | 1        | 98.68%         |
|                        | <i>Trichomonas</i>                               | 0        | 1        | 0        | 99.34%         |
|                        | <i>Tritrichomonas</i>                            | 0        | 1        | 0        | 94.75%         |
| <b>Platyhelminthes</b> |                                                  | <b>3</b> | <b>4</b> | <b>3</b> |                |
|                        | <i>Haematoloechus</i>                            | 3        | 0        | 0        | 98.68%         |
|                        | <i>Pleurogenes/Pleurogenoides</i>                | 0        | 0        | 1        | 94.93%         |
|                        | <i>Pleurogenoides</i>                            | 0        | 0        | 3        | 95.16%-95.37%  |
|                        | <i>Schistosoma</i>                               | 0        | 4        | 0        | 92.05%-100.00% |

659

## 660 Figure legends

661 **Figure 1. Phylogenetic analysis of flavivirus sequences amplified from mosquitoes.** The neighbor-  
662 joining tree shows the relationships between the flavivirus sequences amplified from mosquito pools  
663 from Maryland (red circles) and from individual African mosquitoes (blue triangles). Phylogenetic tree  
664 without compressed branch available in **Supplemental Figure 2**.

665 **Figure 2. Phylogenetic analysis of *Theileria* sequences amplified from Cambodian and African**  
666 ***Anopheles* mosquitoes.** The neighbor-joining tree shows the relationships between the 18S rRNA  
667 *Theileria* sequences amplified from samples positive by high-throughput sequences and those from  
668 known *Theileria* species deposited in NCBI. Sequences amplified from Cambodian mosquitoes are  
669 indicated in green circles, those amplified from African mosquitoes in red squares.

670 **Figure 3. Phylogenetic analysis of unknown filarial worm sequences amplified from Guinean**  
671 **mosquitoes.** The neighbor-joining tree shows the relationships between annotated filarial worm  
672 sequences and a 3.5 kb sequence amplified from two African mosquitoes (red squares) positive for  
673 filarial worms and sequenced using PacBio chemistry.

674 **Figure 4. Comparison of the number of reads obtained for different taxa from matched DNA and cDNA**  
675 **samples derived from Maryland mosquito pools.**

676 Each panel represents results from one primer set and each pair of points connected by a line shows the  
677 number of reads matching a single species detected in both the DNA (left) and RNA (right) from the  
678 same sample. For five primers (red asterisks), the RNA samples yield significantly more reads than the  
679 matching DNA samples ( $p < 0.05$ , Bonferroni-corrected pairwise t-tests).

680

681

Human And Other Flaviviruses

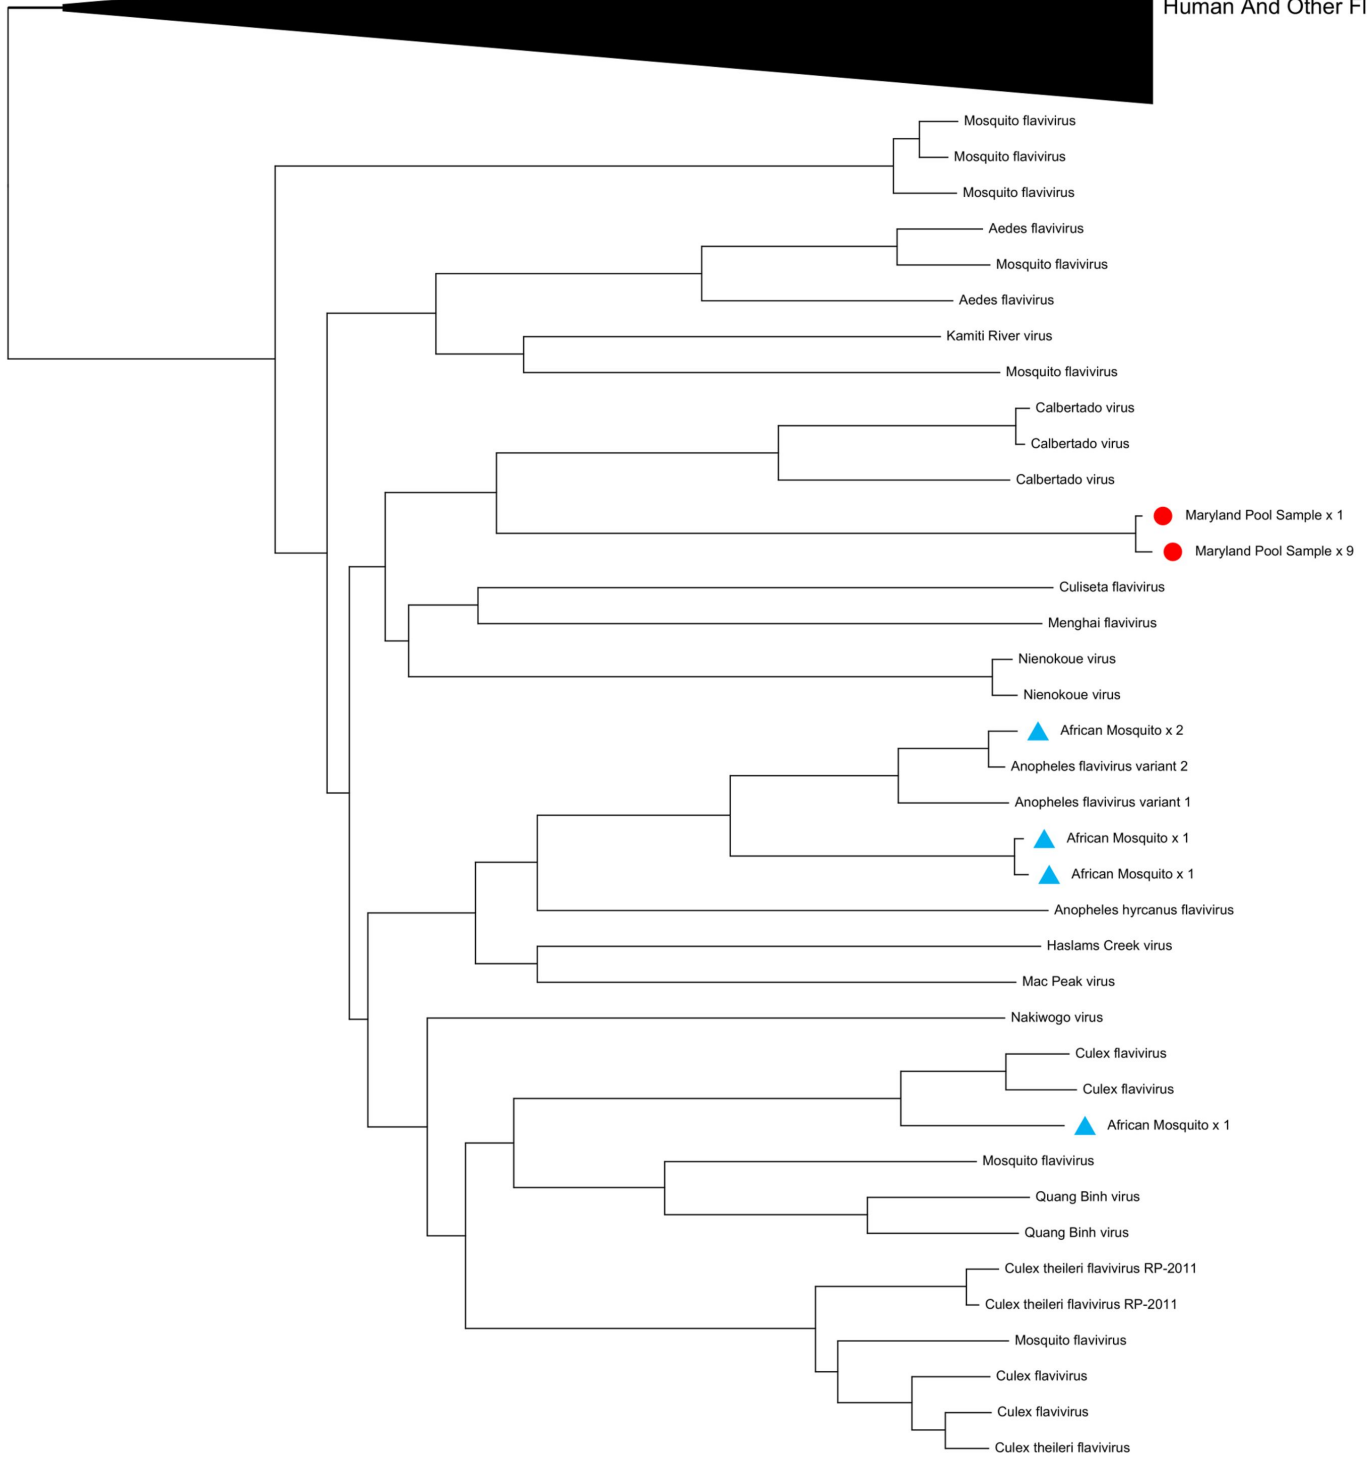

10



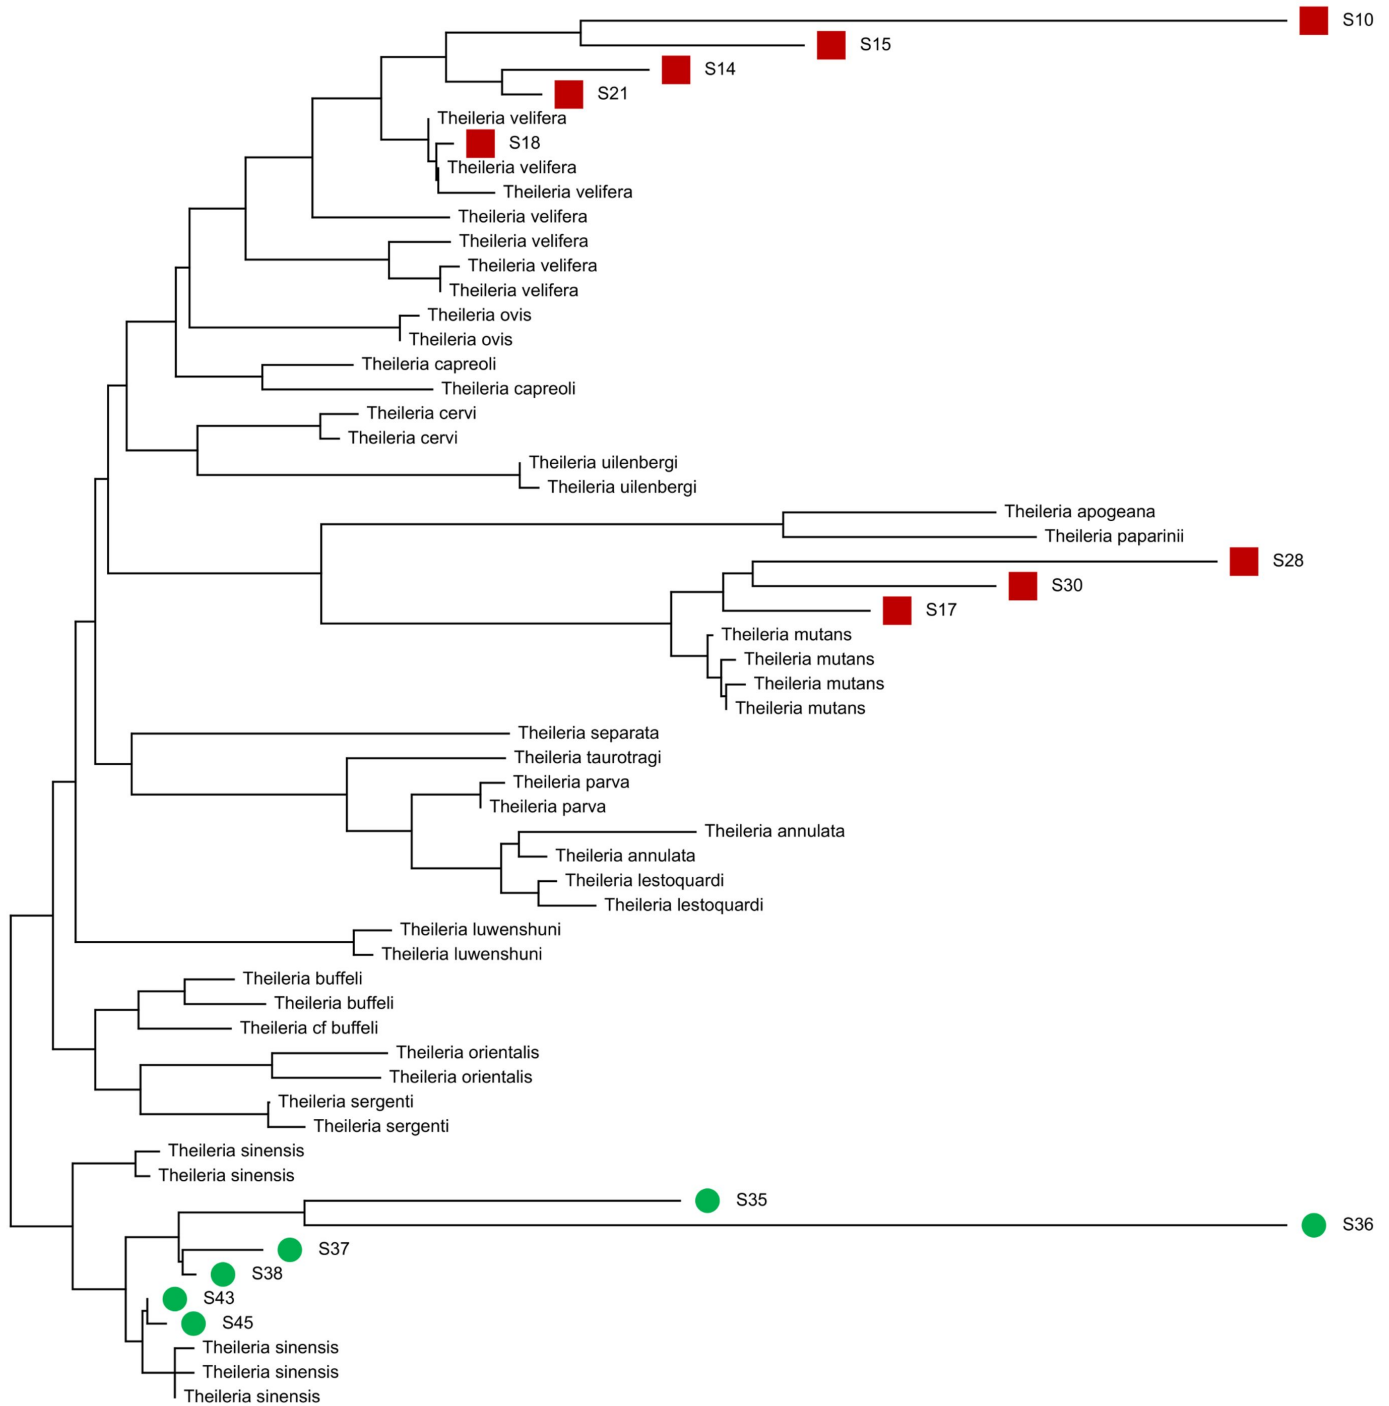

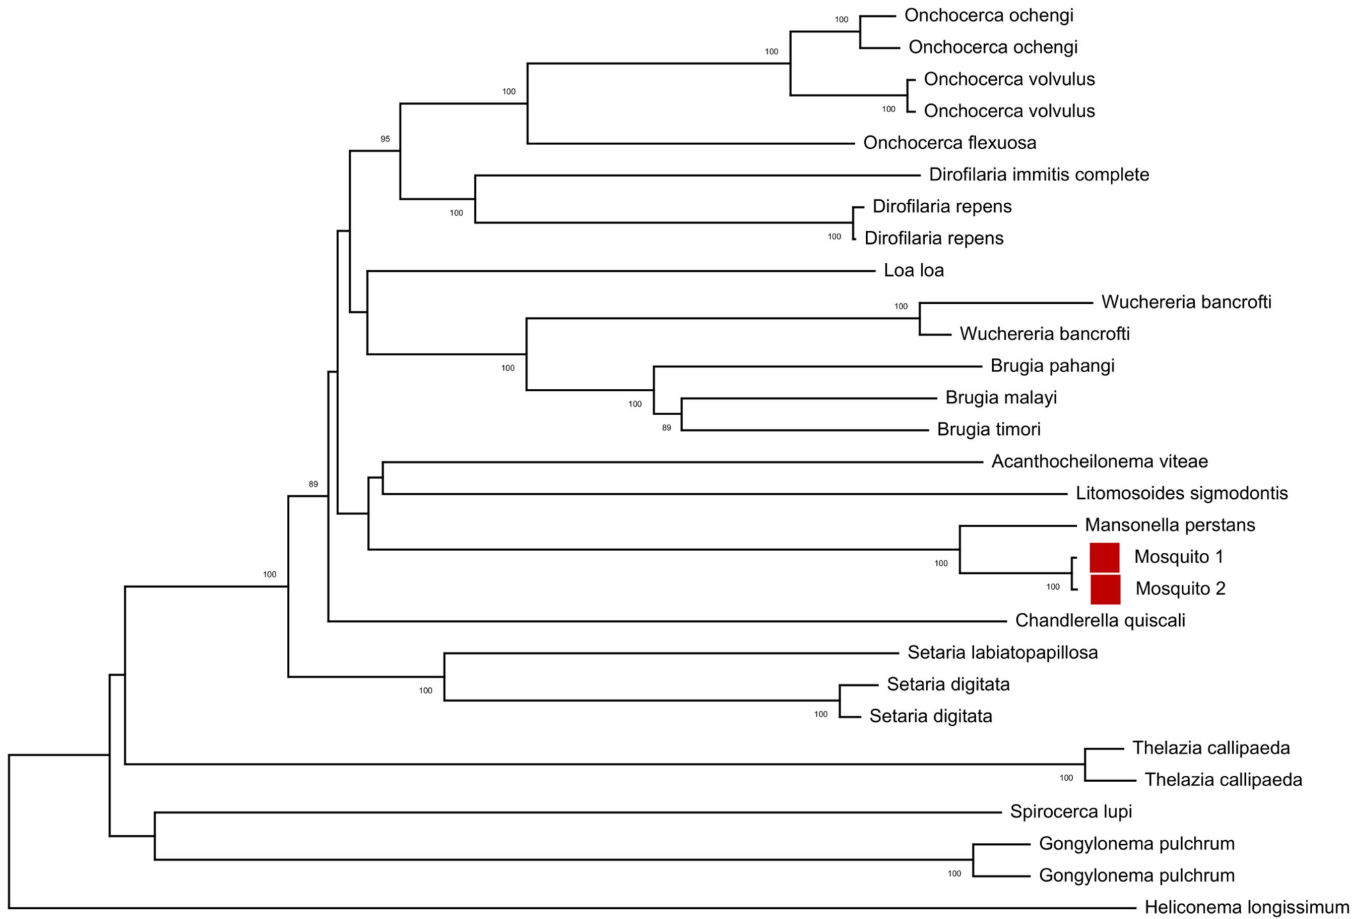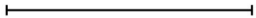

100

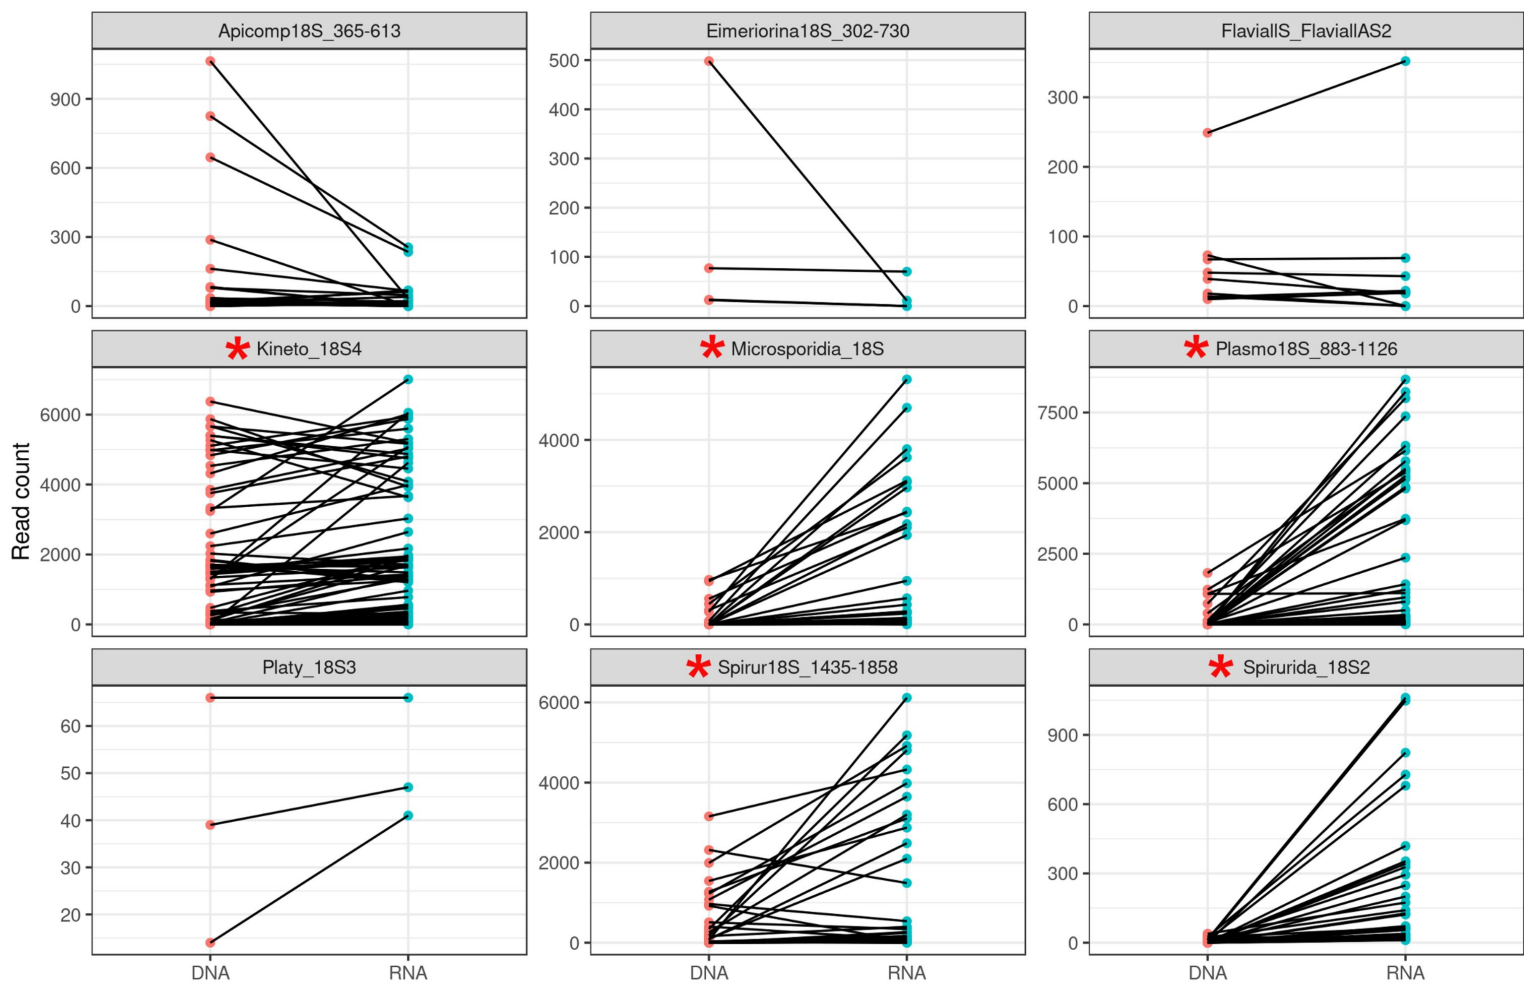

Source: http://biorxiv.org/content/10.1101/2021.01.12.426319v1.full.pdf
